# Supplementary material
Source: bioRxiv or medRxiv preprint supplement (https://www.biorxiv.org/highwire/filestream/108521/field_highwire_adjunct_files/1/358622-10.pdf)

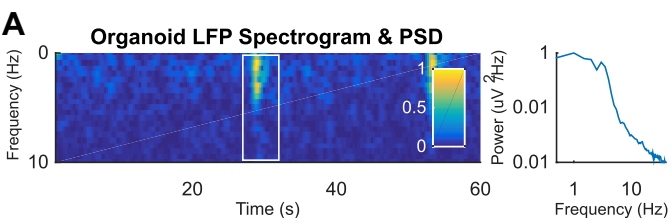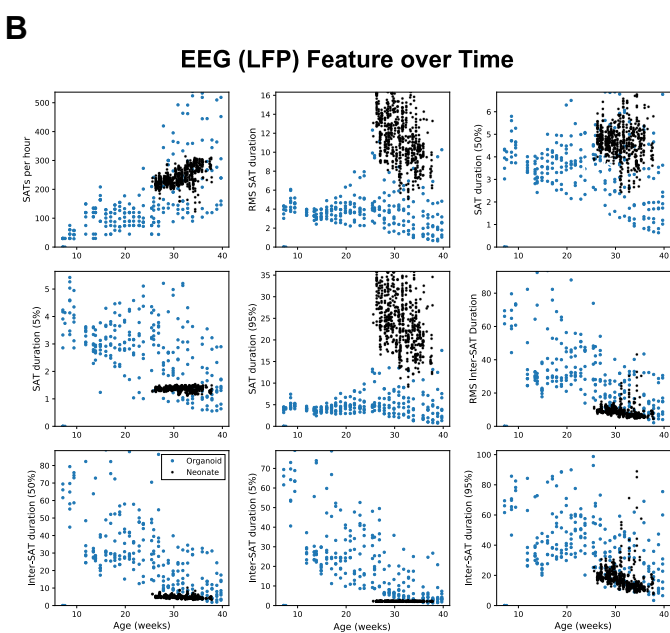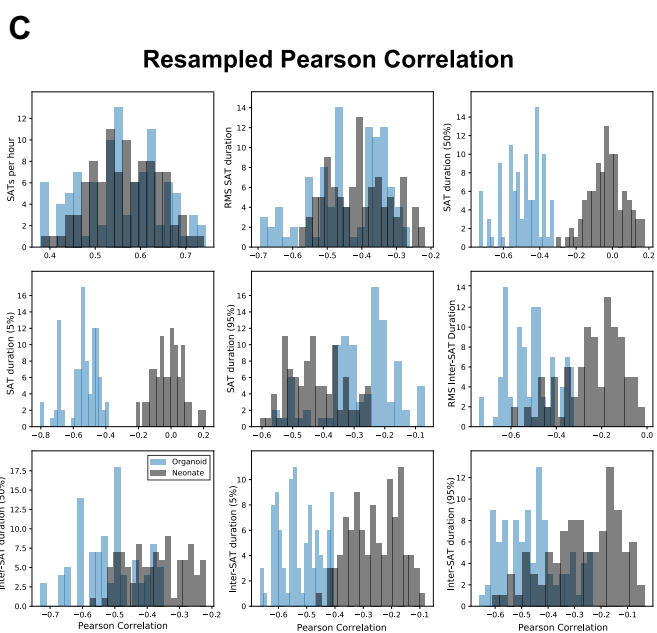

Supplement: Supplementary file [file 358622-10.pdf]
